# Supplementary material for: Development of Oral Microemulsion Spray Containing Pentacyclic Triterpenes-Rich Centella asiatica (L.) Urb. Extract for Healing Mouth Ulcers
Source: MDPI journal article supplement (doi:10.3390/pharmaceutics14112531), 2022-11-20
Supplement: s1 [file s1]

## Supplement data

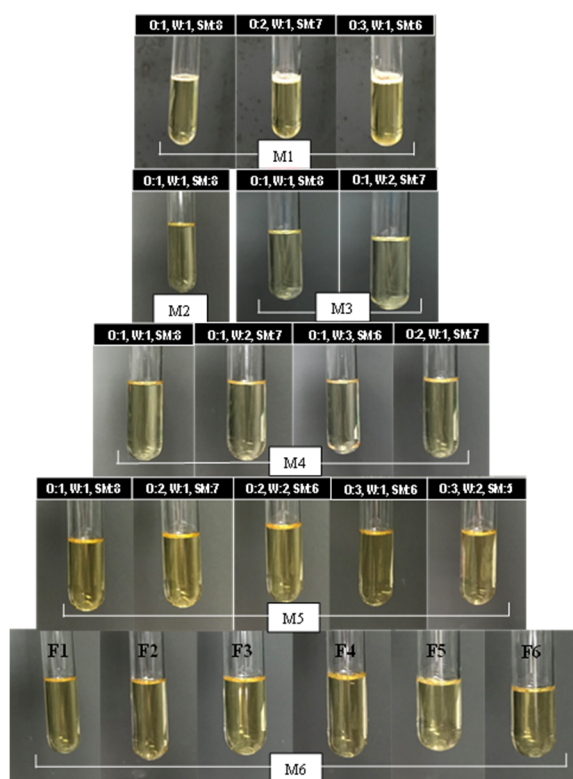

**Supplement Data S1.** The formulations of microemulsion from the pseudo-ternary phase diagram M1-M6 (W = water, O = oil, and SM = surfactant mixture)

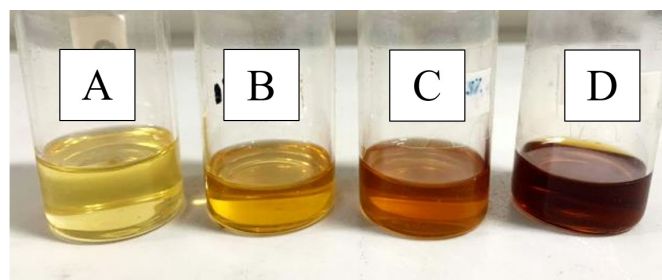

**Supplement Data S2.** The formulations of microemulsion base and microemulsion containing 1, 2.5 and 5% PRE (A = microemulsion base, B = microemulsion containing 1% PRE, C = microemulsion containing 2.5% PRE and D = microemulsion containing 5% PRE)

| Hours | Control                                                                           | Base                                                                              | 1% PRE                                                                             | 2.5% PRE                                                                            | 5% PRE                                                                              |
|-------|-----------------------------------------------------------------------------------|-----------------------------------------------------------------------------------|------------------------------------------------------------------------------------|-------------------------------------------------------------------------------------|-------------------------------------------------------------------------------------|
| 0     | 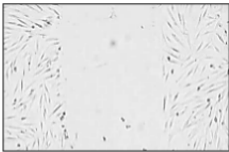 |  |  |  |  |
| 12    |  |  |  |  |  |
| 24    |  |  |  |  |  |
| 48    |  |  |  |  |  |

**Supplement Data S3.** Effect of microemulsion base and microemulsion containing PRE at various concentrations on HDF cells migration assay (base = microemulsion base, 1%PRE, 2.5%PRE, and 5%PRE = microemulsion containing 1, 2.5, and 5% PRE, respectively)

| Hours | Control                                                                           | Base                                                                              | 1% PRE                                                                            | 2.5% PRE                                                                           | 5% PRE                                                                              |
|-------|-----------------------------------------------------------------------------------|-----------------------------------------------------------------------------------|-----------------------------------------------------------------------------------|------------------------------------------------------------------------------------|-------------------------------------------------------------------------------------|
| 0     | 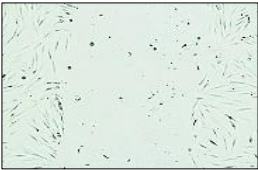 |  |  |  |  |
| 12    |  |  |  |  |  |
| 24    |  |  |  |  |  |
| 48    |  |  |  |  |  |

**Supplement Data S4.** Effect of microemulsion base and microemulsion containing PRE at various concentrations on HGF cells migration assay (base = microemulsion base, 1%, 2.5%, and 5%PRE = microemulsion containing 1, 2.5, and 5% PRE, respectively).
